# Supplementary material for: The topology design principles that determine the spatiotemporal dynamics of G-protein cascades
Source: Royal Society of Chemistry journal article supplement (doi:10.1039/c2mb05375f), 2012-01-04
Supplement: c2mb05375f.pdf [file c2mb05375f.pdf]

## **Electronic Supplementary Information**

### **The Topology Design Principles that Determine the Spatiotemporal Dynamics of G-protein Cascades.**

**Mikhail A. Tsyganov<sup>1,2</sup>, Walter Kolch<sup>2</sup> and Boris N. Kholodenko<sup>2,3\*</sup>**

<sup>1</sup>Institute of Theoretical and Experimental Biophysics, Pushchino, Moscow Region, Russia

<sup>2</sup>Systems Biology Ireland, University College Dublin, Belfield, Dublin 4, Ireland,

<sup>3</sup>Thomas Jefferson University, Department of Pathology, Anatomy, and Cell Biology, Philadelphia, PA 19107, USA

## Supplementary Figures.

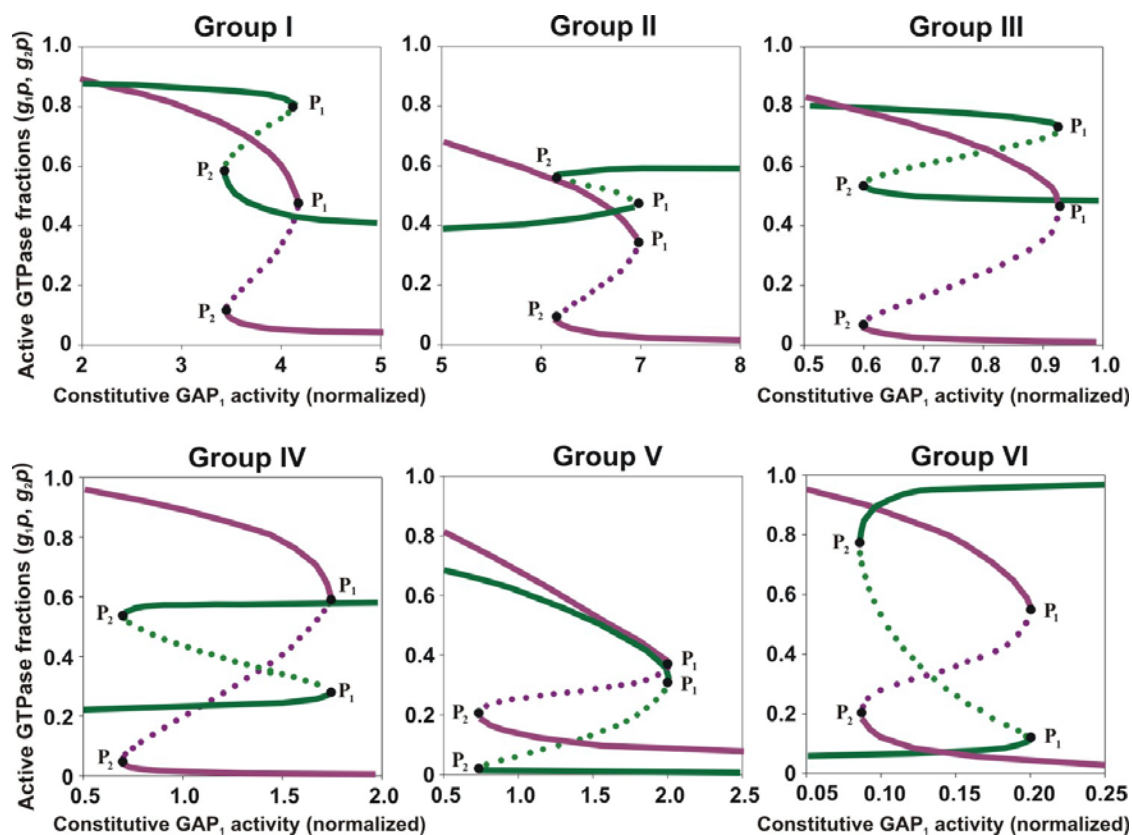

**Fig. S1. Bistability and hysteresis in GTPase cascades in groups I - VI: responses to gradual changes in  $GAP_1$  concentrations.** Hysteretic behavior of the steady-state responses of active GTPase fractions,  $g_{1p}$  (purple) and  $g_{2p}$  (green), to the changes in the input  $GAP_1$  activity (parameter  $r_2$ ) are shown. Dotted lines correspond to unstable steady states located at the intermediate branch of the curve between turning points  $P_1$  and  $P_2$  (marked bold). The dependencies of steady-state responses on parameters are identical for all eight designs within a group, if the relationships between kinetic parameters enabling the identity of steady states are satisfied (see Table 1, Methods). For each group I - VI, the hysteresis curves are calculated for topology design 1, whose kinetic parameters are given in Table S1 where parameter  $r_2$  is varied in the ranges shown ( $s^{-1}$ ). Note that the stationary, active GTPase fractions behave similarly when the input GEF or GAP activity is changed by altering the strength of the autocatalytic loop (given by values of the multipliers  $\alpha_{11}$  and  $\alpha_{12}$ , Eq.4, Methods) rather than by changing the maximal rate  $r_1$  or  $r_2$ .

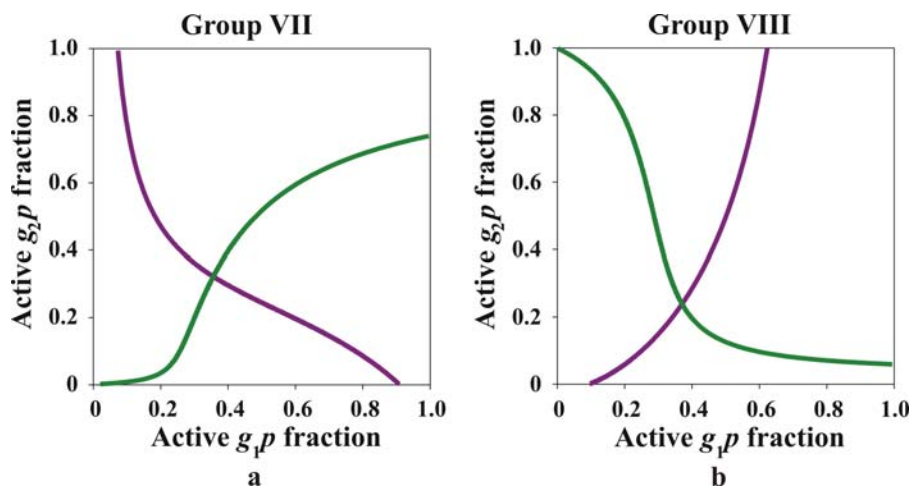

**Fig.S2. Typical nullcline shapes for 16 cascade topologies that comprise VII and VIII groups. (a).** Group VII. The  $g_1p$ -nullcline (purple) is a monotone decreasing function of  $g_1p$  and the  $g_2p$ -nullcline (green) is a monotone increasing function of  $g_1p$ , which cannot intersect at more than one point. **(b).** Group VIII. The  $g_1p$ -nullcline (purple) is a monotone increasing function of  $g_1p$  and the  $g_2p$ -nullcline (green) is a monotone decreasing function of  $g_1p$ , and, therefore, these two nullclines cannot intersect at more than one point. Kinetic parameters are the following: **(a)**  $r_1=1, r_2=0.13, r_3=10, r_4=30$  ( $s^{-1}$ ),  $m_1=0.4, m_2=0.09, m_3=2, m_4=0.01, a_{11}=0.6, m_{11}=0.1, a_{13}=100, m_{13}=3, a_{21}=0.01, m_{21}=0.1$ ; **(b)**  $r_1=1, r_2=1.5, r_3=1, r_4=0.01$  ( $s^{-1}$ ),  $m_1=1, m_2=5, m_3=0.1, m_4=0.05, a_{11}=0.01, m_{11}=0.005, a_{13}=0.004, m_{13}=0.002, a_{21}=100, m_{21}=2$ .

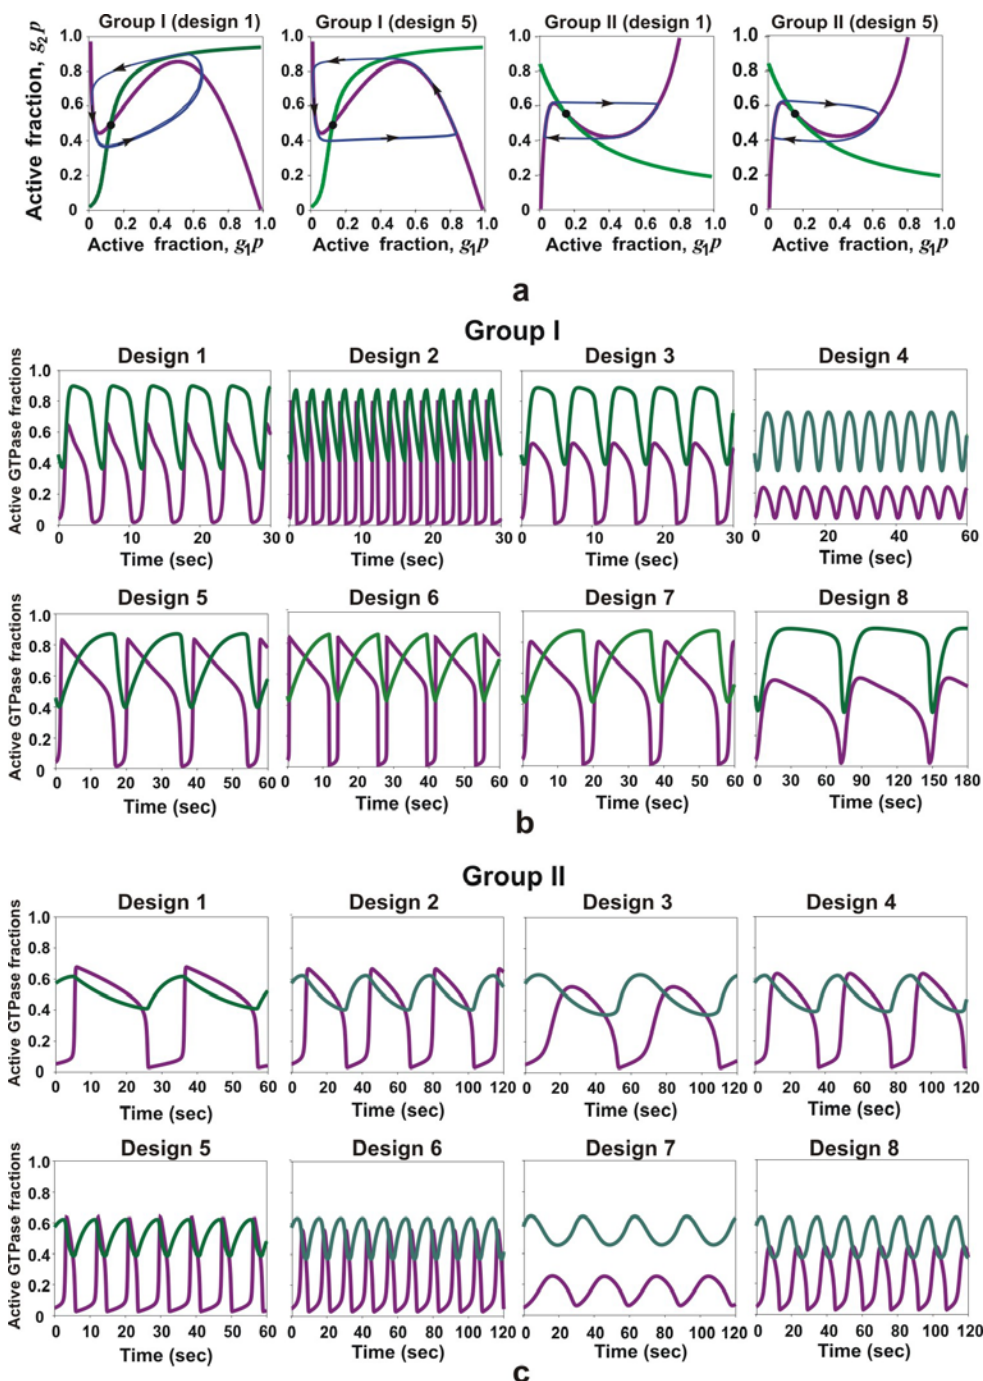

**Fig. S3. Oscillatory regimes of 16 cascades comprising groups I and II.** (a) The  $g_1p$ -nullclines (purple, N-mirror shaped, group I, and N-shaped, group II) and the  $g_2p$ -nullclines (green, monotone) intersect at a single point (marked in bold) corresponding to an unstable steady state. The limit cycle trajectories (blue) on the plane ( $g_1p$ ,  $g_2p$ ) are shown for kinetic designs 1 and 5. Arrows indicate the direction of motion. (b, c) Sustained oscillations of active GTPase fractions ( $g_1p$ , purple and  $g_2p$ , green) are shown for all kinetic designs comprising groups I and II. Kinetic parameters are presented in Table S2 for design 1, and the parameter value relationships for other designs are specified in Table 1 (Methods). For illustrative purposes, for design 4 in group I the constitutive GEF<sub>1</sub> and GAP<sub>1</sub> activities were increased by a factor of 2 compared to the activities presented in Table S2, as follows,  $r_1=10$ ,  $r_2=8$  (s<sup>-1</sup>).

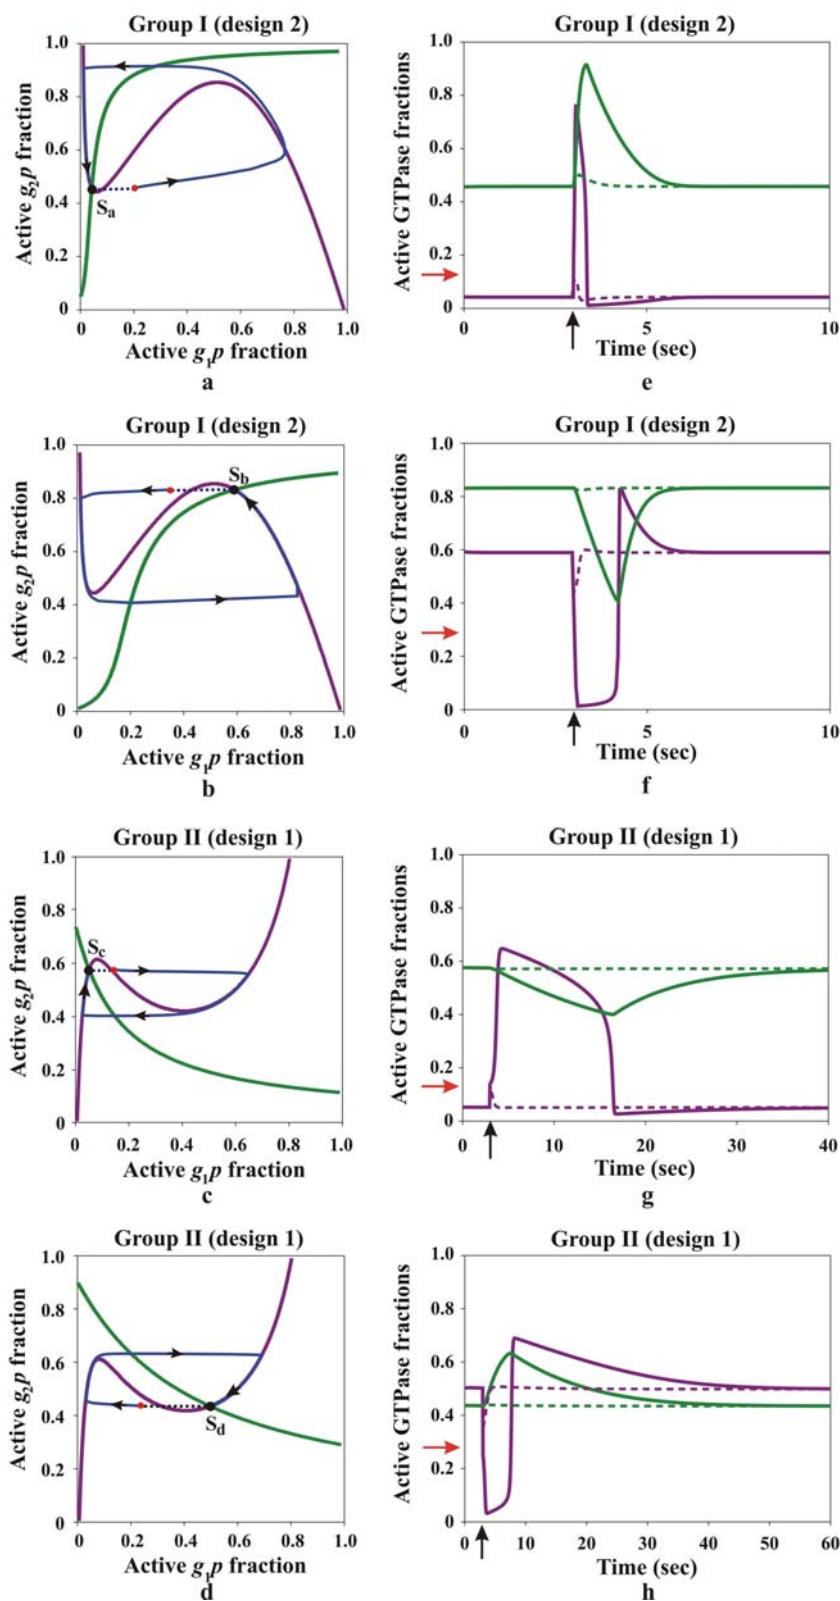

**Fig. S4. Excitable behavior of GTPase cascades.** Initially, each cascade resides in a stable, but excitable steady state. For group I cascades (**a**, **b**), the first  $g_1p$ -nullcline (purple) is N-mirror shaped, and the second  $g_2p$ -nullcline (green) is a monotone increasing function of  $g_1p$ . For group II cascades (**c**, **d**), the first  $g_1p$ -nullcline (purple) is N- shaped, and the second  $g_2p$ -nullcline (green) is a monotone

decreasing function of  $g_1p$  (**a - d**). The two nullclines intersect at a single point, corresponding to a stable steady state (S, bold black dot) positioned at the left arm (**a, c**) or the right arm (**b, d**) of the  $g_1p$ -nullcline. The different steady state positions are brought about by the changes in  $GEF_2$  activity, described by the parameter  $r_3$ , whose magnitudes and the corresponding steady-state values of GTPase fractions ( $g_1p_{ss}$ ,  $g_2p_{ss}$ ) are given in Table S2. The trajectories (blue) presented on the phase plane ( $g_1p$ ,  $g_2p$ ) correspond to over-threshold perturbations (shown by dotted lines which start with steady-state values **S** and end with red dots). Panels (**e - h**) show temporal responses of active GTPase fractions,  $g_1p$  (purple) and  $g_2p$  (green), to sub-threshold (dashed lines) and over-threshold (solid lines) perturbations. At time  $t = 3$  s (marked by black arrow), the steady-state concentration of the active GTPase at the first level ( $g_1p$ ) is perturbed. Sub-threshold perturbations cause small responses shown by dashed lines. Over-threshold perturbations cause large overshoot responses where the active GTPase fractions can significantly increase or decrease, generating temporal pulses of GTPase activities (threshold values of  $g_1p$  perturbation amplitudes are marked by red arrows). It is instructive to note that while  $GEF_2$  activity ( $r_3$ ) varies (decreases for group I cascades or increases for group II cascades), the excitable regime, corresponding to the stable steady state positioned at the left arm of the  $g_1p$ -nullcline (**a, c**) becomes oscillatory, corresponding to the unstable steady state positioned at the middle arm (Fig. S3a). With a further change in  $r_3$ , the oscillatory regime becomes again excitable, corresponding to the stable steady state positioned at the left arm of the  $g_1p$ -nullcline (**b, d**).

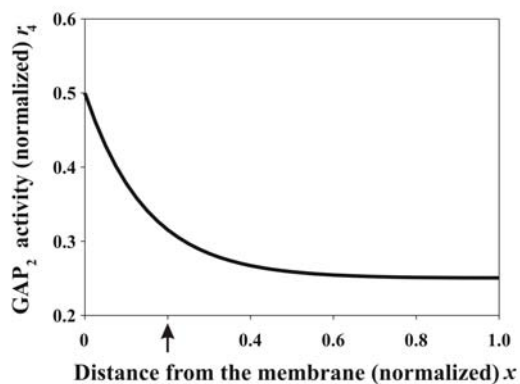

**Fig. S5. Spatial gradient of GAP<sub>2</sub> constitutive activity.** The activity ( $r_4$ ) of GAP<sub>2</sub> decreases with the distance ( $x$ ) from the plasma membrane, as specified by Eq. 10 in Methods. The kinetic parameter values are the following,  $r_4(0)=0.5$ ,  $r_4(1)=0.25$  ( $s^{-1}$ ), and  $\tau=6.7$ . The arrow indicates the spatial coordinate where a transition from an oscillatory to excitable regime occurs (the Hopf bifurcation).

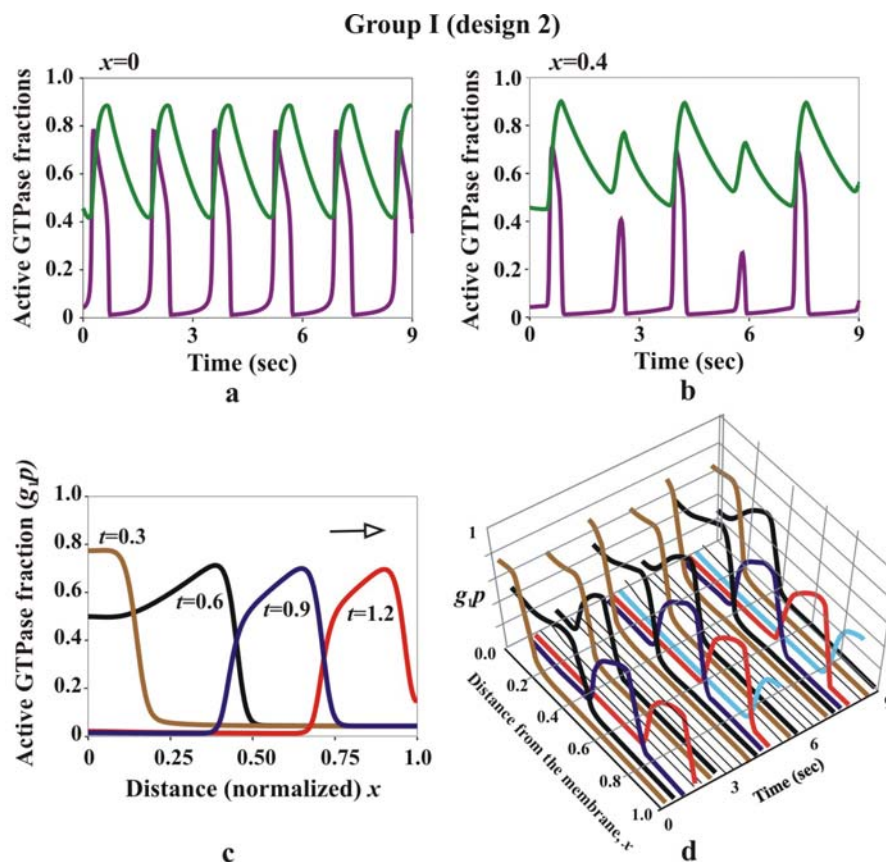

**Fig. S6. Propagation or vanishing of periodic pulses in spatially heterogeneous media.** The spatial gradient of GAP<sub>2</sub> constitutive activity is described by Eq. 10 (Methods) with slightly different kinetic parameters in comparison with Fig. 6, and Fig. S5:  $r_4(0)=1$ ,  $r_4(1)=0.5$ , and  $r_3=0.4$  (s<sup>-1</sup>). (a) Close to the membrane ( $x \approx 0$ ), active GTPase fractions ( $g_{1p}$ , purple and  $g_{2p}$ , green) oscillate with a period of 1.5 s. A decrease in GAP<sub>2</sub> activity farther away from the membrane brings about the change in the cascade dynamics: oscillatory behavior is no longer observed, whereas excitable behavior emerges at  $x \approx 0.2$  (the Hopf bifurcation). (b) Since this period of oscillations is smaller than the recovery time (known as the refractory period) of the emerging excitable media at the distance  $x > 0.2$  from the membrane, not all oscillatory activity maxima lead to the formation of GTPase activity pulses with a large amplitude; some pulses become rather small and subsequently vanish during the propagation through the cell. (c) A pulse-like wave propagating through the cell is shown for a selected time window (0.3 - 1.2 s), using different colors for different time moments. (d) A 3-D presentation of propagating waves of periodic GTPase activity pulses driven by oscillating GTPase activities near the membrane. The remaining kinetic parameters and the initial GTPase activities, which correspond to a spatially homogeneous steady state, are given in Table S2.



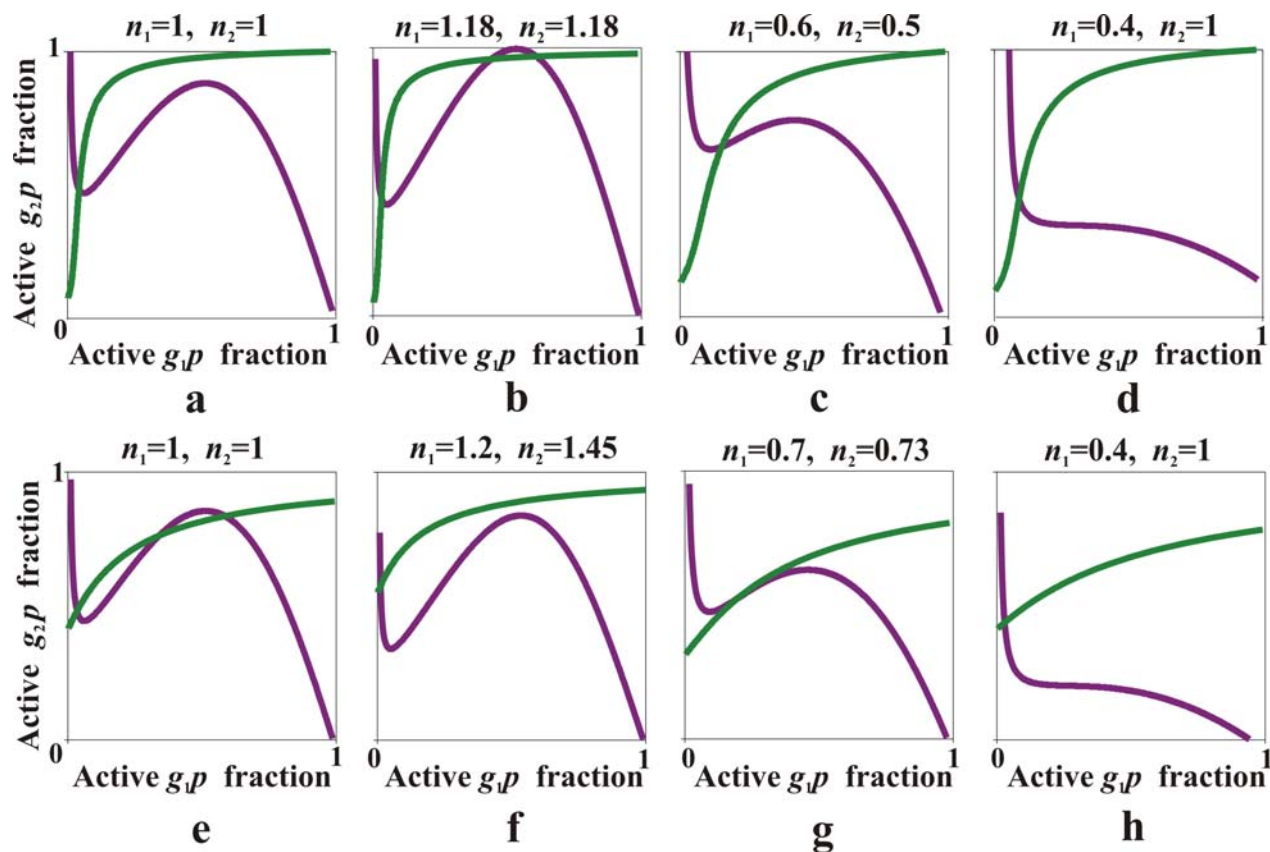

**Fig. S7. Influence of the changes in the total GTPase abundances on the spatiotemporal cascade dynamics.** The figure shows changes in the nullclines and the corresponding dynamic regimes following the alterations in the total abundance of the first and second GTPases ( $G_1^{tot}$  and  $G_2^{tot}$ ),  $G_{1new}^{tot} = n_1 \cdot G_1^{tot}$  and  $G_{2new}^{tot} = n_2 \cdot G_2^{tot}$ . According to Eqs. 1 -4 of the main text, this results in the following parameter changes:  $m_1^{new} = m_1 / n_1$ ,  $m_2^{new} = m_2 / n_1$ ,  $m_3^{new} = m_3 / n_2$ ,  $m_4^{new} = m_4 / n_2$ ,  $m_{ij}^{new} = m_{ij} / n_i$ . **a** -Excitable regime, the nullclines are calculated for parameter values given in Table S2. Following the changes in the total abundances as indicated by the coefficients  $n_1$  and  $n_2$ , the system shifts to different dynamics regimes as follows, **b** - bistable, **c** - oscillatory, and **d** - monostable regimes. **e** -Bistable regime, the nullclines are calculated for parameter values given in Table S1. Following the changes in the total abundances as indicated by the coefficients  $n_1$  and  $n_2$ , the system shifts to different dynamics regimes as follows, **f** -excitable, **g** - oscillatory, and **h** - monostable regimes.

## Supplementary Documents.

### Supplementary Document 1. Different design groups I - VIII are determined by the dimensionless multipliers $\alpha_{ij}$ .

Each cascade group I - VIII is characterized in by the values of the dimensional multipliers  $\alpha_{ij}$ , as follows,

**Groups I - IV** are each hallmarked by an auto-activation loop, ( $\alpha_{11} > 1, \alpha_{12} = 1$ ) or ( $\alpha_{11} = 1, \alpha_{12} < 1$ ), and the remaining  $\alpha_{ij}$  satisfy the following constraints,

Group I: ( $\alpha_{21} < 1, \alpha_{22} = 1$ ) or ( $\alpha_{21} = 1, \alpha_{22} > 1$ ); ( $\alpha_{13} > 1, \alpha_{14} = 1$ ) or ( $\alpha_{13} = 1, \alpha_{14} < 1$ ).

Group II: ( $\alpha_{21} > 1, \alpha_{22} = 1$ ) or ( $\alpha_{21} = 1, \alpha_{22} < 1$ ); ( $\alpha_{13} < 1, \alpha_{14} = 1$ ) or ( $\alpha_{13} = 1, \alpha_{14} > 1$ ).

Group III: ( $\alpha_{21} > 1, \alpha_{22} = 1$ ) or ( $\alpha_{21} = 1, \alpha_{22} < 1$ ); ( $\alpha_{13} > 1, \alpha_{14} = 1$ ) or ( $\alpha_{13} = 1, \alpha_{14} < 1$ ).

Group IV: ( $\alpha_{21} < 1, \alpha_{22} = 1$ ) or ( $\alpha_{21} = 1, \alpha_{22} > 1$ ); ( $\alpha_{13} < 1, \alpha_{14} = 1$ ) or ( $\alpha_{13} = 1, \alpha_{14} > 1$ ).

**Groups V - VIII** are each hallmarked by an auto-inhibition loop, ( $\alpha_{11} < 1, \alpha_{12} = 1$ ) or ( $\alpha_{11} = 1, \alpha_{12} > 1$ ), and the remaining  $\alpha_{ij}$  satisfy the following constraints,

Group V: ( $\alpha_{21} > 1, \alpha_{22} = 1$ ) or ( $\alpha_{21} = 1, \alpha_{22} < 1$ ); ( $\alpha_{13} > 1, \alpha_{14} = 1$ ) or ( $\alpha_{13} = 1, \alpha_{14} < 1$ ).

Group VI: ( $\alpha_{21} < 1, \alpha_{22} = 1$ ) or ( $\alpha_{21} = 1, \alpha_{22} > 1$ ); ( $\alpha_{13} < 1, \alpha_{14} = 1$ ) or ( $\alpha_{13} = 1, \alpha_{14} > 1$ ).

Group VII: ( $\alpha_{21} < 1, \alpha_{22} = 1$ ) or ( $\alpha_{21} = 1, \alpha_{22} > 1$ ); ( $\alpha_{13} > 1, \alpha_{14} = 1$ ) or ( $\alpha_{13} = 1, \alpha_{14} < 1$ ).

Group VIII: ( $\alpha_{21} > 1, \alpha_{22} = 1$ ) or ( $\alpha_{21} = 1, \alpha_{22} < 1$ ); ( $\alpha_{13} < 1, \alpha_{14} = 1$ ) or ( $\alpha_{13} = 1, \alpha_{14} > 1$ ).

### Supplementary Document 2. Relationships between kinetic parameters that enable identical steady states for molecular designs 1 - 8 comprising each topology group (I - VIII).

Using Table 1 (Methods), it is convenient to present the equations that determine nullclines for cascade designs 1 -8, as follows.

| Definition of nullclines               | Design 1                                                                              | Design 2                                                                                                | Design 3                                                                                                                | Design 4                                                                                                |
|----------------------------------------|---------------------------------------------------------------------------------------|---------------------------------------------------------------------------------------------------------|-------------------------------------------------------------------------------------------------------------------------|---------------------------------------------------------------------------------------------------------|
| $dg_1 p / dt = 0$<br>$dg_2 p / dt = 0$ | $\alpha_{11}\alpha_{21}u_1 - u_2 = 0$<br>$\alpha_{13}u_3 - u_4 = 0$                   | $\alpha_{22}(\alpha_{11}\alpha_{22}^{-1}u_1 - u_2) = 0$<br>$\alpha_{13}u_3 - u_4 = 0$                   | $\alpha_{12}\alpha_{22}(\alpha_{12}^{-1}\alpha_{22}^{-1}u_1 - u_2) = 0$<br>$\alpha_{13}u_3 - u_4 = 0$                   | $\alpha_{12}(\alpha_{12}^{-1}\alpha_{21}u_1 - u_2) = 0$<br>$\alpha_{13}u_3 - u_4 = 0$                   |
|                                        | Design 5                                                                              | Design 6                                                                                                | Design 7                                                                                                                | Design 8                                                                                                |
| $dg_1 p / dt = 0$<br>$dg_2 p / dt = 0$ | $\alpha_{11}\alpha_{21}u_1 - u_2 = 0$<br>$\alpha_{14}(\alpha_{14}^{-1}u_3 - u_4) = 0$ | $\alpha_{22}(\alpha_{11}\alpha_{22}^{-1}u_1 - u_2) = 0$<br>$\alpha_{14}(\alpha_{14}^{-1}u_3 - u_4) = 0$ | $\alpha_{12}\alpha_{22}(\alpha_{12}^{-1}\alpha_{22}^{-1}u_1 - u_2) = 0$<br>$\alpha_{14}(\alpha_{14}^{-1}u_3 - u_4) = 0$ | $\alpha_{12}(\alpha_{12}^{-1}\alpha_{21}u_1 - u_2) = 0$<br>$\alpha_{14}(\alpha_{14}^{-1}u_3 - u_4) = 0$ |

Comparing the nullcline equations of design 1 with such equations for designs 2 - 8 above, we can see that these nullclines become identical provided that the following relationships are satisfied:

Design 1 and Design 2:

$$\alpha_{11}^{(1)}\alpha_{21}^{(1)} = \alpha_{11}^{(2)}(\alpha_{22}^{(2)})^{-1} \Rightarrow \alpha_{11}^{(2)} = \alpha_{11}^{(1)}, \alpha_{22}^{(2)} = 1/\alpha_{21}^{(1)} \Rightarrow \frac{1 + a_{22}^{(2)}g_2p/m_{22}^{(2)}}{1 + g_2p/m_{22}^{(2)}} = \frac{1 + g_2p/m_{21}^{(1)}}{1 + a_{21}^{(1)}g_2p/m_{21}^{(1)}} \Rightarrow$$

$$\Rightarrow (a_{22}^{(2)}a_{21}^{(1)} - 1)g_2p + (a_{22}^{(2)}m_{21}^{(1)} + a_{21}^{(1)}m_{22}^{(2)} - m_{21}^{(1)} - m_{22}^{(2)}) = 0 \Rightarrow a_{22}^{(2)}m_{21}^{(1)} + a_{21}^{(1)}m_{22}^{(2)} - m_{21}^{(1)} - m_{22}^{(2)} = 0 \Rightarrow$$

$$\Rightarrow m_{22}^{(2)}(a_{21}^{(1)} - 1) = m_{21}^{(1)}(1 - a_{22}^{(2)}) \Rightarrow \begin{cases} a_{22}^{(2)} = 1/a_{21}^{(1)} \\ m_{22}^{(2)} = m_{21}^{(1)}/a_{21}^{(1)} \end{cases}$$

Design 1 and Design 3:

$$\alpha_{11}^{(1)}\alpha_{21}^{(1)} = (\alpha_{12}^{(3)}\alpha_{22}^{(3)})^{-1} \Rightarrow \alpha_{12}^{(3)} = 1/\alpha_{11}^{(1)}, \alpha_{22}^{(3)} = 1/\alpha_{21}^{(1)} \Rightarrow \begin{cases} a_{22}^{(3)} = 1/a_{21}^{(1)}, m_{22}^{(3)} = m_{21}^{(1)}/a_{21}^{(1)} \\ a_{12}^{(3)} = 1/a_{11}^{(1)}, m_{12}^{(3)} = m_{11}^{(1)}/a_{11}^{(1)} \end{cases}$$

Design 1 and Design 4:

$$\alpha_{11}^{(1)}\alpha_{21}^{(1)} = (\alpha_{12}^{(4)})^{-1}\alpha_{22}^{(4)} \Rightarrow \alpha_{22}^{(4)} = \alpha_{21}^{(1)}, \alpha_{12}^{(4)} = 1/\alpha_{11}^{(1)} \Rightarrow a_{12}^{(4)} = 1/a_{11}^{(1)}, m_{12}^{(4)} = m_{11}^{(1)}/a_{11}^{(1)}$$

Design 1 and Design 5:

$$\alpha_{11}^{(1)}\alpha_{21}^{(1)} = \alpha_{11}^{(5)}\alpha_{21}^{(5)} \Rightarrow \alpha_{11}^{(5)} = \alpha_{11}^{(1)}, \alpha_{21}^{(5)} = \alpha_{21}^{(1)}$$

$$\alpha_{13}^{(1)} = (\alpha_{14}^{(5)})^{-1} \Rightarrow a_{14}^{(5)} = 1/a_{13}^{(1)}, m_{14}^{(5)} = m_{13}^{(1)}/a_{13}^{(1)}$$

Design 1 and Design 6:

$$\alpha_{11}^{(1)}\alpha_{21}^{(1)} = \alpha_{11}^{(6)}(\alpha_{22}^{(6)})^{-1} \Rightarrow \alpha_{11}^{(6)} = \alpha_{11}^{(1)}, \alpha_{22}^{(6)} = 1/\alpha_{21}^{(1)} \Rightarrow \begin{cases} a_{22}^{(6)} = 1/a_{21}^{(1)}, m_{22}^{(6)} = m_{21}^{(1)}/a_{21}^{(1)} \\ a_{14}^{(6)} = 1/a_{13}^{(1)}, m_{14}^{(6)} = m_{13}^{(1)}/a_{13}^{(1)} \end{cases}$$

$$\alpha_{13}^{(1)} = (\alpha_{14}^{(6)})^{-1}$$

Design 1 and Design 7:

$$\alpha_{11}^{(1)}\alpha_{21}^{(1)} = (\alpha_{12}^{(7)}\alpha_{22}^{(7)})^{-1} \Rightarrow \alpha_{12}^{(7)} = 1/\alpha_{11}^{(1)}, \alpha_{22}^{(7)} = 1/\alpha_{21}^{(1)} \Rightarrow \begin{cases} a_{22}^{(7)} = 1/a_{21}^{(1)}, m_{22}^{(7)} = m_{21}^{(1)}/a_{21}^{(1)} \\ a_{12}^{(7)} = 1/a_{11}^{(1)}, m_{12}^{(7)} = m_{11}^{(1)}/a_{11}^{(1)} \\ a_{14}^{(7)} = 1/a_{13}^{(1)}, m_{14}^{(7)} = m_{13}^{(1)}/a_{13}^{(1)} \end{cases}$$

$$\alpha_{13}^{(1)} = (\alpha_{14}^{(7)})^{-1}$$

Design 1 and Design 8:

$$\alpha_{11}^{(1)}\alpha_{21}^{(1)} = (\alpha_{12}^{(8)})^{-1}\alpha_{21}^{(8)} \Rightarrow \alpha_{12}^{(8)} = 1/\alpha_{11}^{(1)}, \alpha_{21}^{(8)} = \alpha_{21}^{(1)} \Rightarrow \begin{cases} a_{12}^{(8)} = 1/a_{11}^{(1)}, m_{12}^{(8)} = m_{11}^{(1)}/a_{11}^{(1)} \\ a_{14}^{(8)} = 1/a_{13}^{(1)}, m_{14}^{(8)} = m_{13}^{(1)}/a_{13}^{(1)} \end{cases}$$

$$\alpha_{13}^{(1)} = (\alpha_{14}^{(8)})^{-1}$$

The parameter relationships presented here in curly brackets are assembled in Table 1 (Methods).

### Supplementary Document 3. Local stability and dynamic properties are identical for all 8 cascade circuitries within each of topology groups I - VIII.

We showed above that for the 8 different kinetic designs comprising each of groups I - VIII, the nullclines and steady states are identical if certain relationships between kinetic constants of regulatory interactions (feedback or feedforward loops) are fulfilled (Table 1, Methods and Supplementary material 2). Here we prove that the local stability and resulting dynamic properties of these designs are also the same. To simplify notations in the mathematical proofs, hereafter we designate the active GTPase fractions as follows,

$$y_1(t) = g_1 p(t), \quad y_2(t) = g_2 p(t).$$

It is convenient to introduce auxiliary parameters  $\kappa_1$  and  $\kappa_2$  as dimensionless multipliers, which modulate the rates (through modulation of constitutive GEF and GAP activities) at the first and second cascade layers, respectively. Thus, the parameter  $\kappa_1$  is a dimensionless multiplier for the rates  $u_1$  and  $u_2$ , and  $\kappa_2$  is a multiplier of the rates  $u_3$  and  $u_4$ . Using  $\kappa_1$  and  $\kappa_2$ , the dynamics of cascade design 1 can be described as follows (see Eqs. 3, 4 in the main text and Table 1 in Methods),

$$\begin{aligned} \frac{dy_1}{dt} &= \kappa_1 \chi_1(y_1, y_2, p), & \chi_1(y_1, y_2, p) &= \alpha_{11}(y_1) \alpha_{21}(y_2) u_1(y_1) - u_2(y_1) \\ \frac{dy_2}{dt} &= \kappa_2 \chi_2(y_1, y_2, p), & \chi_2(y_1, y_2, p) &= \alpha_{13}(y_1) u_3(y_1, y_2) - u_4(y_2) \end{aligned} \quad (\text{S1}),$$

where  $p$  is a vector of parameters, which include the kinetic constants and GEF and GAP concentrations (see Methods for the definitions of the functions  $\alpha_{ij}$  and  $u_i$ ).

If the relationships between kinetic parameters given in Table 1 (Methods) are fulfilled, the equations describing the dynamics of other designs 2 - 8, can be presented as,

$$\begin{aligned} \frac{dy_1}{dt} &= \varphi_1(y_1, y_2) \kappa_1 \chi_1(y_1, y_2, p) \\ \frac{dy_2}{dt} &= \varphi_2(y_1, y_2) \kappa_2 \chi_2(y_1, y_2, p) \end{aligned} \quad (\text{S2}),$$

where the positive multipliers,  $\varphi_i(y_1, y_2) > 0$ , which determine a particular design are given in the table below,

|                         | Designs |                    |                                     |                    |                    |                    |                                     |                    |
|-------------------------|---------|--------------------|-------------------------------------|--------------------|--------------------|--------------------|-------------------------------------|--------------------|
|                         | 1       | 2                  | 3                                   | 4                  | 5                  | 6                  | 7                                   | 8                  |
| $\varphi_1(y_1, y_2) =$ | 1       | $\alpha_{22}(y_2)$ | $\alpha_{12}(y_1) \alpha_{22}(y_2)$ | $\alpha_{12}(y_1)$ | 1                  | $\alpha_{22}(y_2)$ | $\alpha_{12}(y_1) \alpha_{22}(y_2)$ | $\alpha_2(y_1)$    |
| $\varphi_2(y_1, y_2) =$ | 1       | 1                  | 1                                   | 1                  | $\alpha_{14}(y_1)$ | $\alpha_{14}(y_1)$ | $\alpha_{14}(y_1)$                  | $\alpha_{14}(y_1)$ |

The steady states are determined as follows,

$$\frac{dy_1}{dt} = 0; \quad \frac{dy_2}{dt} = 0 \quad (\text{S3}).$$

One can readily see that the nullclines and steady states are identical for both systems 1 and 2 described by Eqs. S1 and S2, respectively. Let  $y_1^{ss}$ ,  $y_2^{ss}$ ,  $\varphi_1^{ss}$ , and  $\varphi_2^{ss}$  be the values of the variables  $y_1, y_2$  and the functions  $\varphi_i$  at a particular steady state, where

$$\begin{aligned} \chi_i(y_1^{ss}, y_2^{ss}, p) &= 0 \\ \varphi_i^{ss} &= \varphi_i(y_1^{ss}, y_2^{ss}) > 0, \quad i = 1, 2 \end{aligned} \quad (\text{S4}).$$

We will next analyze the local stability (also termed exponential stability) of systems 1 and 2 near any steady state point. The Jacobian matrices ( $\mathbf{J}_1$  and  $\mathbf{J}_2$ ) for systems 1 and 2 at the steady state ( $y_1^{ss}, y_2^{ss}$ ) are presented by Eqs. S5 and S6, respectively,

$$\mathbf{J}_1 = \begin{pmatrix} \kappa_1 \frac{\partial \chi_1}{\partial y_1} & \kappa_1 \frac{\partial \chi_1}{\partial y_2} \\ \kappa_2 \frac{\partial \chi_2}{\partial y_1} & \kappa_2 \frac{\partial \chi_2}{\partial y_2} \end{pmatrix}_{y_1^{ss}, y_2^{ss}} \quad (\text{S5}).$$

$$\mathbf{J}_2 = \begin{pmatrix} \kappa_1 \left( \varphi_1 \frac{\partial \chi_1}{\partial y_1} + \chi_1 \frac{\partial \varphi_1}{\partial y_1} \right) & \kappa_1 \left( \varphi_1 \frac{\partial \chi_1}{\partial y_2} + \chi_1 \frac{\partial \varphi_1}{\partial y_2} \right) \\ \kappa_2 \left( \varphi_2 \frac{\partial \chi_2}{\partial y_1} + \chi_2 \frac{\partial \varphi_2}{\partial y_1} \right) & \kappa_2 \left( \varphi_2 \frac{\partial \chi_2}{\partial y_2} + \chi_2 \frac{\partial \varphi_2}{\partial y_2} \right) \end{pmatrix}_{y_1^{ss}, y_2^{ss}} = \begin{pmatrix} \varphi_1^{ss} \kappa_1 \frac{\partial \chi_1}{\partial y_1} & \varphi_1^{ss} \kappa_1 \frac{\partial \chi_1}{\partial y_2} \\ \varphi_2^{ss} \kappa_2 \frac{\partial \chi_2}{\partial y_1} & \varphi_2^{ss} \kappa_2 \frac{\partial \chi_2}{\partial y_2} \end{pmatrix}_{y_1^{ss}, y_2^{ss}} \quad (\text{S6}).$$

We see that for system 2, the determinant of the Jacobian matrix  $\mathbf{J}_2$  is multiplied by a positive factor that equals the product of  $\varphi_1^{ss}$  and  $\varphi_2^{ss}$ . Therefore, the condition  $\det(\mathbf{J}) = 0$  will be true (or false) at the same parameter values for both systems 1 and 2. Consequently, if the saddle-node bifurcation occurs, it will take place for both systems simultaneously. However, Eq. S6 shows that the trace of the Jacobian is different for these two systems,

$$\text{tr}(\mathbf{J}_1) = \kappa_1 \frac{\partial \chi_1}{\partial y_1} + \kappa_2 \frac{\partial \chi_2}{\partial y_2} \quad (\text{S7})$$

and

$$\text{tr}(\mathbf{J}_2) = \varphi_1^{ss} \kappa_1 \frac{\partial \chi_1}{\partial y_1} + \varphi_2^{ss} \kappa_2 \frac{\partial \chi_2}{\partial y_2} \quad (\text{S8}).$$

Therefore, at first glance, the eigen values of the Jacobians  $\mathbf{J}_1$  and  $\mathbf{J}_2$  are not equal. Can we still say something about the local stability of a steady state of system 2, if we know the local stability of the same steady state of system 1?

Fortunately, the dimensionless multipliers,  $\kappa_1$  and  $\kappa_2$ , can be modified without any change of the steady state values,  $y_1^{ss}, y_2^{ss}$ . If for system 2, we select the  $\kappa_1^*$  and  $\kappa_2^*$  values, as follows,  $\varphi_1^{ss} \kappa_1^* = \kappa_1$ ,  $\varphi_2^{ss} \kappa_2^* = \kappa_2$ , then the Jacobians of both systems 1 and 2 become identical at the same steady state,  $y_1^{ss}, y_2^{ss}$ ,

$$\mathbf{J}_1(\kappa_1, \kappa_2) = \mathbf{J}_2(\kappa_1^*, \kappa_2^*).$$

This proves that both systems 1 and 2 (which are described by Eq. S1 and S2, respectively) can have the same Jacobian eigen values for the stationary solution, and thus possess similar local stability and dynamic properties (although at different parameter values, at the value  $\kappa_1$  and  $\kappa_2$  for system 1 and  $\kappa_1^*$  and  $\kappa_2^*$  for system S2).

#### Supplementary Document 4. Nullcline analysis.

First we show that for topology groups I - VIII, the  $g_2p$ -nullcline is a monotone function of  $g_1p$  for kinetic parameter values. Since for all 8 cascade designs within each topology group, the nullclines are identical when the proper relationships between the regulatory loop constants are fulfilled (see Table 1, Methods), we only consider nullclines for kinetic design 1.

As above, we simplify notations by designating  $y_1(t) = g_1p(t)$ ,  $y_2 = g_2p(t)$ . For cascade design 1 in each topology group (I - VIII), the  $g_2p$ -nullcline ( $dy_2/dt = 0$ ) is determined as follows (see Eqs. 3 and 4 and Table 1, Methods),

$$r_3 \cdot \frac{1 + a_{13}y_1/m_{13}}{1 + y_1/m_{13}} \cdot \frac{(1 - y_2)/m_3}{1 + (1 - y_2)/m_3} - r_4 \cdot \frac{y_2/m_4}{1 + y_2/m_4} = 0 \quad (\text{S9}).$$

Rearranging, we obtain,

$$(a_{13} - Y(y_2))y_1 = m_{13}(Y(y_2) - 1) \quad (\text{S10}).$$

Here the function  $Y$  is introduced to simplify notations,

$$Y(y_2) = \frac{r_4 y_2 (m_3 + 1 - y_2)}{r_3 (m_4 + y_2) (1 - y_2)} \quad (\text{S11}).$$

We will show now that  $a_{13} \neq Y$  for any  $y_2$  value,  $0 < y_2 < 1$ . Assuming that  $a_{13} - Y(y_2) = 0$  for some  $y_2$ , it follows that the right hand side of Eq. S10 should equal 0, that is,  $Y(y_2) = 1$ . Then from our initial assumption,  $a_{13}$  must be equal to 1. Recall that for design 1 in each topology group,  $a_{13} \neq 1$ , and so our assumption that  $a_{13} - Y(y_2) = 0$  must be false, and this proves that  $a_{13} \neq Y$ .

Using Eq. S10,  $y_1$  can be presented as the following function of  $y_2$ ,

$$y_1(y_2) = m_{13} \frac{Y(y_2) - 1}{a_{13} - Y(y_2)} \quad (\text{S12}).$$

If the function  $y_1(y_2)$  is not monotone, then the derivative  $dy_1/dy_2$  must equal zero at some  $y_2$ ,

$$\frac{dy_1}{dy_2} = \frac{m_{13}(a_{13} - 1)}{(a_{13} - Y(y_2))^2} Y'(y_2) = 0 \quad (\text{S13}).$$

This implies that  $dY/dy_2 = 0$  at some  $y_2$ . Differentiating Eq. S11 results in the following quadratic equation for the  $y_2$  value(s), at which Eq. S13 holds,

$$(m_3 + m_4)y_2^2 - 2m_4y_2 + (m_3 + 1)m_4 = 0 \quad (\text{S14}).$$

Since the discriminant of this quadratic equation is negative,

$$D = 4m_4^2 - 4(m_3 + 1)m_4(m_3 + m_4) = -4m_3(m_4^2 + (m_3 + 1)m_4) < 0,$$

Eq. S13 does not have real value solutions. This proves that the  $g_2p$ -nullcline,  $dy_2/dt = 0$ , is a monotone function. From Eq. S13, we can see that the sign of the derivative,  $dy_2/dy_1$  is determined by the

difference,  $a_{13} - 1$ . If  $a_{13} > 1$ , the  $g_2p$ -nullcline is a monotone increasing function of  $g_1p$ , and when  $a_{13} < 1$ , the  $g_2p$ -nullcline is a monotone decreasing function. This proves that for cascade designs comprising groups I, III, V and VII, the  $g_2p$ -nullcline is a monotone increasing function, and this nullcline is a monotone decreasing function for cascades in groups II, IV, VI, VIII (see Fig. 3 and Fig. S2, S3 and S4).

Next we show that for topology groups V - VIII, the  $g_1p$ -nullcline is a monotone function of  $g_2p$  for any values of kinetic parameters. As above, it is sufficient to consider only kinetic design 1. The  $g_1p$ -nullcline for cascade design 1 can be determined from the following equation,  $dy_1/dt = 0$ ,

$$r_1 \frac{1 + a_{11} \cdot y_1 / m_{11}}{1 + y_1 / m_{11}} \frac{1 + a_{21} \cdot y_2 / m_{21}}{1 + y_2 / m_{21}} \frac{(1 - y_1) / m_1}{1 + (1 - y_1) / m_1} - r_2 \frac{y_1 / m_2}{1 + y_1 / m_2} = 0 \quad (\text{S15}).$$

Rearranging, we obtain,

$$(a_{21} - Z(y_1))y_2(y_1) = m_{21}(Z(y_1) - 1) \quad (\text{S16}).$$

Here  $Z(y_1) = \frac{r_2 y_1 (m_1 + 1 - y_1)(y_1 + m_{11})}{r_1 (m_2 + y_1)(m_{11} + a_{11} y_1)(1 - y_1)}$  (S17).

Since for design 1 in each topology group,  $a_{21} \neq 1$ , it can be shown that  $a_{21} \neq Z$  for any for any  $y_1$  value,  $0 < y_1 < 1$ . Similar to above, the assumption  $a_{21} - Z = 0$  for some  $y_2$  would imply that  $a_{21}$  must be equal 1, which is untrue for design 1. From Eq. (S16), it follows that,

$$y_2(y_1) = m_{21} \frac{Z(y_1) - 1}{a_{21} - Z(y_1)} \quad (\text{S18}).$$

If the function  $y_2(y_1)$  is not monotone, then the derivative  $dy_2 / dy_1$  must equal zero at some  $y_1$ ,

$$\frac{dy_2}{dy_1} = \frac{m_{21}(a_{21} - 1)}{(a_{21} - Z(y_1))^2} Z'(y_1) = 0 \quad (\text{S19}).$$

Differentiating the function  $Z$ , we obtain the following equation for the  $y_1$  value that satisfies Eq. (S19),

$$c_4 y_1^4 + c_3 y_1^3 + c_2 y_1^2 + c_1 y_1 + c_0 = 0 \quad (\text{S20}),$$

where the parameter values are given as follows,

$$\begin{aligned} c_4 &= m_{11}(1 - a_{11}) + a_{11}m_1 + a_{11}m_2 \\ c_3 &= 2(a_{11}m_{11}(m_1 + 1) + m_{11}m_2 - m_{11} - a_{11}m_2) \\ c_2 &= m_{11}^2 m_2 + m_{11}^2 m_1 + a_{11}m_{11}km_1 + m_{11}(m_1 + 1)(1 - a_{11}) + a_{11}m_2(m_1 + 1) - m_{11}m_2(m_1 + 1) - 3m_{11}m_2 \quad (\text{S21}). \\ c_1 &= 2(m_{11}m_2(m_1 + 1) - m_{11}^2 m_2) \\ c_0 &= m_{11}^2 m_2(m_1 + 1) \end{aligned}$$

Taking Eq. S21 into consideration, it is convenient to regroup the different terms of Eq. S20, presenting this equation as the sum of the five following terms,

$$\mu_1 + \mu_2 + \mu_3 + \mu_4 + \mu_5 = 0 \quad (\text{S22}),$$

where,

$$\begin{aligned} \mu_1 &= a_{11}m_1y_1^4 + [m_{11}^2m_1 + a_{11}m_{11}m_2m_1]y_1^2 \\ \mu_2 &= m_{11}(1-a_{11})y_1^4 - 2m_{11}(1-a_{11}(m_1+1))y_1^3 + m_{11}(m_1+1)(1-a_{11})y_1^2 > m_{11}y_1^2(1-a_{11})[y_1^2 - 2y_1 + (m_1+1)] \\ \mu_3 &= a_{11}m_2y_1^4 - 2a_{11}m_2y_1^3 + a_{11}m_2(m_1+1)y_1^2 = a_{11}m_2y_1^2(y_1^2 - 2y_1 + (m_1+1)) = a_{11}m_2y_1^2[(y_1-1)^2 + m_1] \\ \mu_4 &= m_{11}^2m_2y_1^2 - 2m_{11}^2m_2y_1 + m_{11}^2m_2(m_1+1) = m_{11}^2m_2(y_1^2 - 2y_1 + (m_1+1)) = m_{11}^2m_2[(y_1-1)^2 + m_1] \\ \mu_5 &= 2m_{11}m_2y_1^3 - (3m_{11}m_2 + m_{11}m_2(m_1+1))y_1^2 + 2m_{11}m_2(m_1+1)y_1 = m_{11}m_2y_1[2y_1^2 - (4+m_1)y_1 + 2(m_1+1)] = \\ &= 2(1-y_1)^2 + 2m_1(1-y_1) + m_1y_1 \end{aligned}$$

Since all kinetic constants are positive and  $a_{11} < 1$  for each group V-VIII (hallmarked by an auto-inhibitory loop, Fig. 1b), one can readily see that each term ( $\mu_1, \mu_2, \mu_3, \mu_4, \mu_5$ ) is positive, and therefore the left-hand side of Eq. S20 is always positive. This proves that for cascade designs comprising groups V-VIII, Eq. S19 does not have solutions for any  $0 < y_1 < 1$ , and the  $g_{1p}$ -nullcline,  $dy_1/dt = 0$ , is monotone function. The sign of the derivative,  $dy_1/dy_2$  is determined by the sign of the difference,  $a_{21} - 1$  (see Eq. S13). If  $a_{21} > 1$ , the  $g_{1p}$ -nullcline is monotone increasing function, and when  $a_{21} < 1$ , the  $g_{1p}$ -nullcline is monotone decreasing function. This proves that for cascade designs in groups V and VIII, the  $g_{1p}$ -nullcline is a monotone increasing function, whereas for groups VI and VII the  $g_{1p}$ -nullcline is a monotone decreasing function (see Fig. 3 and Fig.S2).

### Supplementary Document 5. Influence of small G-protein overexpression on the spatiotemporal cascade dynamics.

Many GTPases are overexpressed in cancer<sup>1</sup>. Although increases in the total GTPase abundances ( $G_1^{tot}$  and  $G_2^{tot}$ ) can change the spatiotemporal dynamics, a particular G-protein cascade still belongs to the same topology group. In fact, different topology groups are determined by the dimensionless multipliers  $a_{ij}$  that do not depend on  $G_1^{tot}$  and  $G_2^{tot}$  (see Materials and Methods, Eqs 2 and 4, and Supplementary Document 1). Therefore, merely overexpression of small G-proteins, but not a mutation that can make it constantly active, does not change the types of possible dynamic behaviors in time and space. Moreover, under specific saturating conditions the basal GTPase fractions at steady state are relatively insensitive to GTPase overexpression<sup>1</sup>. Yet in the other cellular context, even relatively small variations in the total GTPase abundances can dramatically change the cascade dynamic behavior, as illustrated in Fig. S7.

References.

1. S. Legewie, C. Sers and H. Herzel, *FEBS Lett*, 2009, **583**, 93-96.



**Table S1. Kinetic parameters of bistable regimes and active GTPase fractions ( $g_1p_{ss}$  and  $g_2p_{ss}$ ) at two different steady states  $S_1$  and  $S_2$  for cascade design 1 in groups I – VI\*.**

|                    | Design 1      |       |               |       |               |       |               |       |               |       |               |       |
|--------------------|---------------|-------|---------------|-------|---------------|-------|---------------|-------|---------------|-------|---------------|-------|
|                    | Group I       |       | Group II      |       | Group III     |       | Group IV      |       | Group V       |       | Group VI      |       |
| $r_1$ ( $s^{-1}$ ) | 5             |       | 10            |       | 1             |       | 1             |       | 1             |       | 1             |       |
| $r_2$ ( $s^{-1}$ ) | 4             |       | 6.5           |       | 0.65          |       | 0.8           |       | 1.6           |       | 0.13          |       |
| $r_3$ ( $s^{-1}$ ) | 0.13          |       | 0.4           |       | 0.5           |       | 0.1           |       | 1             |       | 1             |       |
| $r_4$ ( $s^{-1}$ ) | 0.072         |       | 0.7           |       | 0.6           |       | 0.5           |       | 3             |       | 0.01          |       |
| $m_1$              | 0.7           |       | 25            |       | 25            |       | 0.7           |       | 1             |       | 0.4           |       |
| $m_2$              | 0.15          |       | 0.09          |       | 0.09          |       | 0.15          |       | 5             |       | 0.09          |       |
| $m_3$              | 0.6           |       | 5             |       | 5             |       | 0.8           |       | 2             |       | 0.1           |       |
| $m_4$              | 0.05          |       | 14            |       | 5.5           |       | 8             |       | 0.005         |       | 0.05          |       |
| $a_{11}$           | 200           |       | 200           |       | 200           |       | 200           |       | 0.01          |       | 0.6           |       |
| $m_{11}$           | 4             |       | 10            |       | 10            |       | 4             |       | 0.005         |       | 0.1           |       |
| $a_{13}$           | 100           |       | 0.005         |       | 40            |       | 0.05          |       | 100           |       | 0.004         |       |
| $m_{13}$           | 40            |       | 0.5           |       | 10            |       | 0.3           |       | 3             |       | 0.002         |       |
| $a_{21}$           | 0.02          |       | 80            |       | 80            |       | 0.02          |       | 100           |       | 0.01          |       |
| $m_{21}$           | 0.04          |       | 20            |       | 20            |       | 0.04          |       | 2             |       | 0.1           |       |
|                    | Steady states |       | Steady states |       | Steady states |       | Steady states |       | Steady states |       | Steady states |       |
|                    | $S_1$         | $S_2$ |
| $g_1p_{ss}$        | 0.035         | 0.59  | 0.055         | 0.485 | 0.038         | 0.756 | 0.023         | 0.91  | 0.1           | 0.483 | 0.078         | 0.83  |
| $g_2p_{ss}$        | 0.48          | 0.83  | 0.586         | 0.43  | 0.516         | 0.8   | 0.56          | 0.23  | 0.0045        | 0.49  | 0.94          | 0.68  |

\*The input GEF<sub>1</sub> activity (parameter  $r_1$ ) is varied to obtain the hysteretic plots shown in Fig. 3 (right panels) of the main text. In Figs. 5 and 6 of the main text the relationships between the kinetic parameters of designs 1 and 2 is given in Table I (Methods).

**Table S2. Kinetic parameters of oscillatory and excitable regimes and active GTPase fractions ( $g_1p_{ss}$  and  $g_2p_{ss}$ ) at steady states for cascade design 1 in groups I and II.**

|               | Design 1    |               |       |             |               |       |
|---------------|-------------|---------------|-------|-------------|---------------|-------|
|               | Group I     |               |       | Group II    |               |       |
|               | Oscillatory | Excitable     |       | Oscillatory | Excitable     |       |
| $r_1(s^{-1})$ | 5           | 5             |       | 10          | 10            |       |
| $r_2(s^{-1})$ | 4           | 4             |       | 6.5         | 6.5           |       |
| $r_3(s^{-1})$ | 0.2         | 0.4*, 0.125*  |       | 1           | 0.55**, 1.7** |       |
| $r_4(s^{-1})$ | 0.5         | 0.5           |       | 0.55        | 0.55          |       |
| $m_1$         | 0.7         | 0.7           |       | 25          | 25            |       |
| $m_2$         | 0.15        | 0.15          |       | 0.09        | 0.09          |       |
| $m_3$         | 0.6         | 0.6           |       | 5           | 5             |       |
| $m_4$         | 0.05        | 0.05          |       | 14          | 14            |       |
| $a_{11}$      | 200         | 200           |       | 200         | 200           |       |
| $m_{11}$      | 4           | 4             |       | 10          | 10            |       |
| $a_{13}$      | 100         | 100           |       | 0.005       | 0.005         |       |
| $m_{13}$      | 3           | 3             |       | 0.05        | 0.05          |       |
| $a_{21}$      | 0.02        | 0.02          |       | 80          | 80            |       |
| $m_{21}$      | 0.04        | 0.04          |       | 20          | 20            |       |
|               | -----       | Steady states |       | -----       | Steady states |       |
|               |             | $S_a$         | $S_b$ |             | $S_c$         | $S_d$ |
| $g_1p_{ss}$   | -----       | 0.044         | 0.59  | -----       | 0.05          | 0.5   |
| $g_2p_{ss}$   |             | 0.46          | 0.83  |             | 0.58          | 0.44  |

\* Group I:  $r_3= 0.4$  and steady state  $S_a$  correspond to Figs.4e, 5c and 6 of the main text and Fig.S4a;  $r_3= 0.125$  and steady state  $S_b$  correspond to Figs. 4f and 5d of the main text and Fig.S4b.

\*\* Group II:  $r_3= 0.55$  and steady state  $S_c$  correspond to Fig. 4g of the main text and Fig.S4c;  $r_3= 1.7$  and steady state  $S_d$  correspond to Fig. 4h of the main text and Fig.S4d.

For Fig. 4-6 of the main text the relationships between the kinetic parameters of designs 1, 2 and 5 are given in Table I (Methods).

**Table S3. Kinetic parameters of bistable, oscillatory and excitable regimes and active GTPase fractions ( $g_1p_{ss}$ ,  $g_2p_{ss}$  and  $g_3p_{ss}$ ) at two different steady states  $S_1$  and  $S_2$  of a 3-tier cascade shown in Fig. 7 in the main text\***

|               | Bistable      |       | Oscillatory | Excitable    |
|---------------|---------------|-------|-------------|--------------|
| $r_1(s^{-1})$ | 1             |       | 1           | 8            |
| $r_2(s^{-1})$ | 20            |       | 35          | 80           |
| $r_3(s^{-1})$ | 5             |       | 50          | 50           |
| $r_4(s^{-1})$ | 4             |       | 40          | 40           |
| $r_5(s^{-1})$ | 0.12          |       | 0.12        | 0.12         |
| $r_6(s^{-1})$ | 0.75          |       | 0.75        | 0.75         |
| $m_1$         | 0.5           |       | 1.45        | 1.45         |
| $m_2$         | 0.005         |       | 1.2         | 0.01         |
| $m_3$         | 0.7           |       | 0.7         | 0.7          |
| $m_4$         | 0.15          |       | 0.15        | 0.15         |
| $m_5$         | 0.6           |       | 0.6         | 0.6          |
| $m_6$         | 0.05          |       | 0.05        | 0.05         |
| $a_{13}$      | 100           |       | 100         | 100          |
| $m_{13}$      | 2             |       | 2           | 2            |
| $a_{21}$      | 200           |       | 200         | 200          |
| $m_{21}$      | 4             |       | 4           | 4            |
| $a_{25}$      | 100           |       | 100         | 100          |
| $m_{25}$      | 15            |       | 3           | 3            |
| $a_{34}$      | 50            |       | 50          | 50           |
| $m_{34}$      | 2             |       | 2           | 2            |
|               | Steady states |       | -           | Steady state |
|               | $S_1$         | $S_2$ |             | S            |
| $g_1p_{ss}$   | 0.0025        | 0.456 |             | 0.003        |
| $g_2p_{ss}$   | 0.19          | 0.91  |             | 0.11         |
| $g_3p_{ss}$   | 0.014         | 0.09  |             | 0.04         |

\*The steady-state values of active GTPase fractions ( $g_1p_{ss}$ ,  $g_2p_{ss}$ ,  $g_3p_{ss}$ ) were used as the initial spatially homogeneous conditions in Fig. 7c (steady state  $S_1$ ) and Fig. 7d (steady state S) of the main text. The initial perturbation in Fig. 7c was the following,  $g_1p(x,0) = 0.8$  for  $0 \leq x \leq 0.03$ .
